# Supplementary material
Source: Springer Nature journal article supplement (https://www.springermedizin.de/resource/supplementary/12955_2010_685_MOESM2_ESM.pdf/9561098)

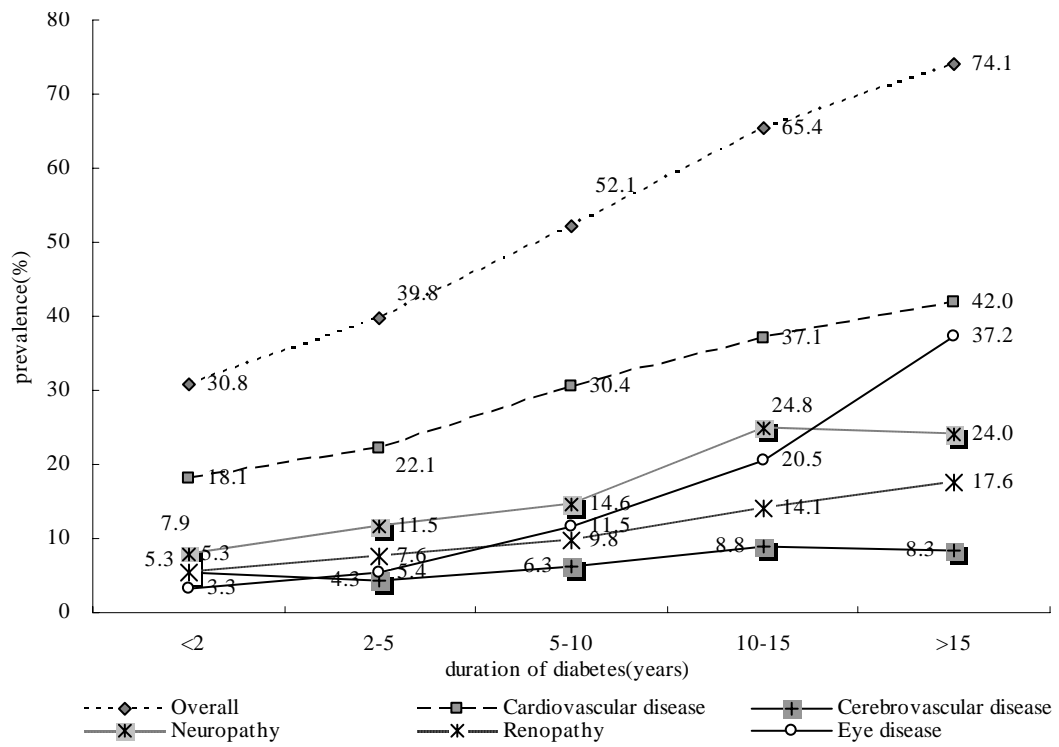

Figure 2. Age-adjusted prevalence of chronic complications of T2DM by diabetic duration

Supplement: MOESM2 [file 9561098]
